# 1 **Biofilm structure promotes coexistence of phage-resistant** 2 **and phage-susceptible bacteria**

3  
4 Matthew Simmons<sup>1,2†</sup>, Matthew C. Bond<sup>2†</sup>, Britt Koskella<sup>3</sup>, Knut Drescher<sup>4,5</sup>, Vanni Bucci<sup>1,6\*</sup>,  
5 Carey D. Nadell<sup>2\*</sup>

6  
7 <sup>1</sup> Department of Bioengineering, Program in Biotechnology and Biomedical Engineering, University of  
8 Massachusetts Dartmouth, N. Dartmouth, MA 02747, USA

9  
10 <sup>2</sup> Department of Biological Sciences, Dartmouth, Hanover, NH 03755, USA

11  
12 <sup>3</sup> Department of Integrative Biology, University of California, Berkeley, Berkeley, CA 94720, USA

13  
14 <sup>4</sup> Max Planck Institute for Terrestrial Microbiology, D-35043 Marburg, Germany

15  
16 <sup>5</sup> Department of Physics, Philipps-Universität Marburg, D-35032 Marburg, Germany

17  
18 <sup>6</sup> Department of Microbiology and Physiological Systems, University of Massachusetts Medical School,  
19 Worcester, MA 01605, USA

20  
21  
22  
23 † Co-first authors

24  
25 \* Authors for correspondence:

26  
27 Carey Nadell ([carey.d.nadell@dartmouth.edu](mailto:carey.d.nadell@dartmouth.edu))

28 Vanni Bucci ([vanni.bucci2@umassmed.edu](mailto:vanni.bucci2@umassmed.edu))

29

30 **Abstract**

31 Encounters among bacteria and their viral predators (bacteriophages) are likely among the most common  
32 ecological interactions on Earth. Phage-bacterial coevolution has received abundant theoretical and  
33 experimental attention for decades and forms an important basis for molecular genetics and theoretical  
34 ecology and evolution. However, at present, relatively little is known about the nature of phage-bacteria  
35 interaction inside the surface-bound communities that microbes often occupy in natural environments.  
36 These communities, termed biofilms, are encased in a matrix of secreted polymers produced by their  
37 microbial residents. Biofilms are spatially constrained such that interactions become limited to neighbors  
38 or near neighbors; diffusion of solutes and particulates is often reduced; and there is pronounced  
39 heterogeneity in nutrient access and therefore physiological state. These factors can dramatically impact  
40 the way phage infections proceed even in simple, single-strain biofilms. Here we investigate how biofilm-  
41 specific properties impact bacteria-phage population dynamics using a computational simulation  
42 framework customized for implementing phage infection inside biofilms containing phage-resistant and  
43 phage-susceptible bacteria. Our simulations predict that it is far more common for phage-susceptible and  
44 phage-resistant bacteria to coexist inside biofilms relative to planktonic culture, where phages and hosts  
45 are well-mixed. We characterize the population dynamic feedbacks underlying this coexistence, and we  
46 then confirm that coexistence is recapitulated in an experimental model of biofilm growth measured with  
47 confocal microscopy at single-cell resolution. Our results provide a clear view into the population  
48 dynamics of phage resistance in biofilms with microscopic resolution of the underlying cell-cell and cell-  
49 phage interactions; they also draw an analogy between phage 'epidemics' on the sub-millimeter scale of  
50 biofilms and the process of herd immunity studied for decades at much larger spatial scales in populations  
51 of plants and animals.

## 52 **Introduction**

53 Because of the sheer number of bacteria and phages in nature, interactions between them are very  
54 common (1–9). The imperative of evading phages on the part of their bacterial hosts – and of accessing  
55 hosts on the part of phages – has driven the evolution of sophisticated defensive and offensive strategies  
56 by both (10, 11). Phage resistance can evolve very rapidly in well-mixed liquid cultures of bacteria under  
57 phage attack (2, 12, 13). This process has been studied for decades, however phage resistance evolution  
58 has received little attention in the context of biofilms, in which cells adhere to surfaces and embed  
59 themselves in a secreted polymer matrix (14–16). Biofilm growth is thought to be the most common mode  
60 of bacterial life, but we are only just beginning to understand the mechanistic and ecological details of  
61 phage-bacteria interaction within them (9, 17–19).

62 Microenvironments within biofilms are highly heterogeneous, including steep gradients in nutrient  
63 availability, waste product accumulation, oxygenation, and pH, among other factors (20, 21).  
64 Furthermore, biofilm structure can impede the movement of solutes and particles that ordinarily would  
65 pose grave threats in well-mixed liquid conditions. The extracellular matrix of *Pseudomonas aeruginosa*,  
66 for instance, can block the diffusion of antibiotics such as tobramycin (22, 23). Biofilm matrix secreted by  
67 *Escherichia coli* and *P. aeruginosa* can also alter phage movement (17, 18), and mucoid colony  
68 phenotypes, which correlate with higher capsule or matrix secretion, rapidly evolve under lytic phage  
69 exposure in *E. coli* and *P. fluorescens* (24, 25). This work suggests biofilm production can be central to  
70 bacteria-host dynamics, but the spatial and temporal complexity of biofilm communities make it difficult  
71 to anticipate how they will impact micro-scale spatial population dynamics of susceptible hosts and  
72 resistant mutants under phage attack.

73 Beyond their deep importance to microbial natural history, phages' ability to rapidly destroy  
74 susceptible populations makes them attractive as alternative antimicrobials (12, 26, 27). Optimizing  
75 phages for this purpose, including an understanding of phage resistance evolution among host bacteria,  
76 requires a thorough look at phage-biofilm interactions (28, 29). In particular, biofilm growth may have  
77 profound impacts on the relative advantages and disadvantages of phage resistance, because the spatial  
78 structure within biofilms can potentially protect susceptible cells from phage exposure (17, 18, 30–33).

79 Here we set out to investigate the processes underlying selection for phage resistance in biofilms.  
80 To do this we use a combination of spatially explicit simulations and microfluidics-based biofilm  
81 experiments with high resolution confocal microscopy. Our simulations predict that biofilm growth  
82 promotes the coexistence of phage-susceptible and phage-resistant hosts for a broad range of relevant  
83 parameters of the system. Coexistence is driven by positive selection for phage-resistant hosts when  
84 they are rare, but neutral or negative selection for phage-resistant hosts when they are common. We

85 confirmed that this result is supported by experiments, using live biofilms of *E. coli* exposed to lytic phage  
86 T7 as a model system.

87

## 88 **Results**

89 In biofilm environments, the population dynamics of bacteria and their lytic phages are driven by many  
90 processes, including bacterial growth, cell-cell shoving, solute advection/diffusion, phage-host  
91 attachment probabilities, phage lag time and burst size, and phage advection/diffusion, among others (9,  
92 30). To study these processes we expanded a simulation framework previously developed by our groups  
93 that captures the biological and solute/particle transport processes inherent to biofilm communities (30)  
94 (SI Materials and Methods). The framework implements the growth up to hundreds of thousands of  
95 discrete bacteria and phages in explicit space, and we now extended it to be able to simulate genetically  
96 susceptible and resistant bacterial sub-populations (see Materials and Methods). In our simulation model,  
97 cells are inoculated onto a solid surface at the bottom of a 2-D space with lateral periodic boundary  
98 conditions. Growth-limiting nutrients diffuse from a bulk liquid layer at the top of the 2-D space towards  
99 the biofilm front, where they can be depleted due to consumption by cells (Figure 1A). The biofilm surface  
100 erodes in a height-dependent manner, reflecting the increase in shear rate with distance from the surface  
101 (34). After a pre-set interval of biofilm growth, phages are introduced to the system in a pulse at one  
102 location along the biofilm's upper surface (varying the timing or location of phage pulses had little impact  
103 on the results, see Supplementary Information). In the simulations, phages can associate with cells in  
104 the biofilm and initiate infections, or be released into the surrounding liquid, where they diffuse for a full  
105 simulation iteration cycle prior to being swept out of the system by advection (Figure 1A). We  
106 implemented phage diffusional movement by algorithmic rules that are described in detail in the SI  
107 Materials and Methods.

108 To understand the population dynamics of phages in the presence of biofilms that contain both  
109 susceptible and resistance bacterial strains, we constrained our simulations using experimentally  
110 measured parameters for bacterial growth, phage replication, and nutrient diffusion (See Table S1),  
111 based on *E. coli* and its lytic phage T7 (the same species used in our experiments, see below). We  
112 explored the impact of factors that are likely to vary in natural environments where phage-biofilm  
113 interactions occur. The first is nutrient availability, which controls overall biofilm expansion rate (35, 36).  
114 We also varied the initial population ratio of susceptible to resistant host bacteria. In this way, we could  
115 test for the invasibility of phage-resistant and phage-susceptible cells when rare. For example, if resistant  
116 cells always increase (/decrease) in frequency regardless of their initial fraction, we can infer that they  
117 are being positively (/negatively) selected. On the other hand, if they increase when initially rare but  
118 decrease when initially common, then we can infer that resistant and susceptible cells will tend toward

119 coexistence (37). For comparison, we also include simulations with no spatial structure, where all cells  
120 and phages are allowed to interact randomly. We also tested for the effect of variation in bacterial fitness  
121 cost of phage resistance, variation in phage diffusivity, variation in how phages were introduced to the  
122 biofilm surface, and whether phages were introduced at earlier or later time points during biofilm growth  
123 (see Supplementary Information).

124

### 125 **Biofilms facilitate coexistence of phage-resistant and -susceptible cells**

126 The full results of our parameter sweeps are shown in Figure S1, and for clarity we show a representative  
127 sub-set of these results in Figure 1B, where the fitness cost (i.e. growth rate decrement) of displaying  
128 phage resistance is a 5% reduction in maximum growth rate, and phages are moderately impeded from  
129 diffusion in biofilms. On the scale of the whole biofilm simulation space, the overriding pattern of our  
130 simulations was positive selection for phage resistant cells when they are initially rare, and either neutral  
131 or negative selection for resistant cells when they are initially more abundant (SI Figure S1; SI Video S1  
132 and Video S2). We observed the same qualitative results when our simulations were implemented in 3-  
133 D space as well (SI Video S3 and Video S4). This outcome predicts a trend toward coexistence of phage-  
134 resistant and phage-susceptible cells in the absence of further evolutionary dynamics, which is not the  
135 case for well-mixed populations, where resistant cells are uniformly positively selected (Figure S2). We  
136 observed the same qualitative pattern as shown in Figure 1B when we varied the biofilm size at which  
137 phages were introduced, and there was similarly little effect if phages were introduced at a single point  
138 or evenly along the entire biofilm surface (Figure S3). The strength of negative frequency-dependent  
139 selection, and the predicted stable frequencies of resistance and susceptible cells, are tuned by phage  
140 mobility and the cost of phage resistance, but overall qualitative pattern of predicted coexistence is highly  
141 robust to parameter changes (Figure S1) (37–40). We next explored the origin of this negative frequency-  
142 dependence: in the face of lytic phage attack and limited phage movement in biofilms, why do phage-  
143 resistant cells fare well when rare, but fare poorly when common?

144 ***Clearance of susceptible cells when they are common*** – When phage-susceptible cells start  
145 in the majority within a biofilm, the few resistant cells initially in the population are concentrated into a few  
146 small groups. As a result, when phages enter the system, they have ready access to susceptible hosts  
147 that occupy the majority of space, and the propagating infection eliminates most or all of the susceptible  
148 population. After this clearance event, the few remaining phage-resistant cells have an abundance of  
149 open space to occupy as they continue to grow with reduced competition for nutrient sources in the  
150 surrounding medium (Figure 2A,B). Unless the cost of phage resistance is very high (Figure S1), resistant  
151 cells tend not to reach fixation due to small pockets of susceptible cells that are protected from phage

152 exposure by neighboring resistant cells (Figure 2B). This latter effect is strengthened if resistant cells are  
153 initially abundant, as detailed below.

154 **Phage sequestering by resistant cells when they are common** – When phage-resistant cells  
155 are initially common, phage-susceptible cell clusters are isolated among larger groups of resistant cells.  
156 If phage diffusion is even moderately impeded by the presence of biofilm, then susceptible cells gain  
157 protection from phages. This occurs because phages become trapped on the periphery of clusters of  
158 resistant cells, and because phages released into the liquid phase are often blocked from long-range  
159 movement by groups of resistant cells in their path. The lower the frequency of susceptible cells in the  
160 initial inoculum, the stronger the effect of these spatial phage protection mechanisms. In this scenario, if  
161 there is no cost to resistance, then susceptible and resistant cells compete neutrally. If there is a fitness  
162 cost to resistance, then susceptible cells have an intrinsic growth rate advantage, and they increase in  
163 frequency if they are initially rare (Figure 2A,C).

#### 164 165 **Experimental model of phage resistance population dynamics**

166 Our simulation results predict a trend toward coexistence of phage-susceptible and phage-resistant cells.  
167 Here we set out to test this prediction using an experimental model of biofilm growth and lytic phage  
168 infection tracking. Biofilms of *E. coli* were cultivated in microfluidic devices, including co-cultures of wild  
169 type AR3110 (WT), which is phage-susceptible, and an isogenic strain harboring a clean deletion of *trxA*  
170 (see Materials and Methods). The  $\Delta trxA$  mutant lacks thioredoxin A, which is an essential DNA  
171 processivity factor for the lytic phage T7. The  $\Delta trxA$  mutant therefore allows for phage attachment, but  
172 does not allow for phage amplification (41). We chose the  $\Delta trxA$  mutant as representative of phage-  
173 resistant variants because it does not support phage propagation but is able to form biofilms normally.  
174 Almost all other mutations conferring T7 resistance are in the LPS assembly machinery, and our pilot  
175 experiments indicated that these mutant classes are defective for biofilm formation. This is a notable cost  
176 of LPS-modification-dependent phage resistance, but in order to test our predictions we required a T7-  
177 resistant mutant capable of biofilm formation and thus focus on the  $\Delta trxA$  background for the remainder  
178 of the paper. Growth curves in shaken liquid media identical to that used for biofilm experiments indicated  
179 that the phage-resistant  $\Delta trxA$  mutant has a growth rate cost of 7.9% +/- 0.69% (Figure S4)

180 The *E. coli* experimental biofilms were cultivated in microfluidic devices composed of a chamber  
181 molded into PDMS, which was then bonded to a glass coverslip for imaging on an inverted confocal  
182 microscope. Prior work has shown that even susceptible biofilms of WT *E. coli* AR3110 can protect  
183 themselves from phage after 55-60 h of growth, when they produce a curli amyloid fiber mesh that blocks  
184 phage diffusion (18). Here biofilms of WT and  $\Delta trxA$  mutant were cultivated for only 48 hours prior to  
185 phage exposure, such that no curli-mediated phage protection could occur during the initial phage

186 exposure. In different runs of the experiment, mimicking our simulation approach, we inoculated the glass  
187 bottom of flow devices with varying ratios of phage-susceptible and phage-resistant bacterial cells.  
188 Analogous to the simulations, we allowed biofilms to grow undisturbed for 48 hours and then subjected  
189 them to a pulse of high-density phage suspensions (Figure S5; Materials and Methods). Biofilm  
190 populations were then imaged by confocal microscopy at regular intervals for 2 days. For each imaging  
191 session, the entire biofilm volume was captured in successive optical sections.

192 We found that when phage-resistant cells were initially rare, susceptible cells were killed off by  
193 phage exposure and mostly cleared out of the chambers, opening new space into which resistant cells  
194 could grow for the remainder of the experiment (Figure 3A,B). As in our simulations, resistant cells often  
195 did not reach fixation as small clusters of susceptible cells remained. On the other hand, when phage-  
196 resistant cells were initially common (~60% of the population, or more), the relative fraction of resistant  
197 and susceptible host bacteria did not substantially change following phage treatment (Figure 3A,C). We  
198 did not observe localized cycling of resistant and susceptible cells, as one might predict in closed and  
199 shaken liquid culture conditions, most likely because phages were either sequestered locally within  
200 clusters of resistant cells (Figure 4), or advected out of the system by ongoing fluid flow in our microfluidic  
201 devices.

202 Our experimental results thus displayed a good qualitative match to our simulation predictions.  
203 The spatial patterns underlying these outcomes were the same as those observed in our simulations,  
204 including a clearance of susceptible cells when resistant cells are initially rare. In this condition,  
205 susceptible cells are exposed to phages; the remaining resistant cell clusters then have ample room to  
206 multiply (Figure 3B). Our experiments also confirmed that susceptible cells are protected when they are  
207 initially rare: when resistant cells are common, they often sequester phages away from susceptible cells,  
208 which then remain near their initial frequency in the population (Figure 3C). To further test this inference,  
209 we introduced fluorescently labelled T7 phages to biofilms initiated with a majority of resistant bacteria,  
210 and directly observed that these phages immobilized in regions of the biofilm occupied purely by resistant  
211 cells (Figure 4, additional replicas in Figure S6).

212

## 213 **Discussion**

214 Our results provide a foundation for understanding how decreased phage mobility within biofilms  
215 determine the population dynamics of phage resistance. Using simulations with extensive parameter  
216 sweeps, we found a trend toward negative frequency-dependent selection for phage  
217 resistance/susceptibility that is highly robust to parameter changes.

218 The origins of frequency-dependent selection are tied to the cell movement constraints and  
219 competition for space in biofilms. When phage-resistant bacteria are initially rare, introduced phages



220 have open access to susceptible hosts, which are mostly killed, leaving empty space for the residual  
221 resistant cell clusters to occupy. On the other hand, when phage-resistant bacteria are initially common,  
222 they create barriers between phages and clusters of susceptible cells. So long as there is limited diffusion  
223 of phages through biofilm biomass, this spatial arrangement provides protection to susceptible cells,  
224 whose population frequency can then drift or increase significantly depending on the fitness costs of  
225 phage resistance. The experimental results were a good qualitative match to these simulation predictions,  
226 as we could observe both the clearance and phage sequestration effects, depending, as anticipated, on  
227 the initial fractions of resistant and susceptible bacterial cells. Because both resistant and susceptible  
228 cells are particularly successful when rare – which would be the case when one is a mutant singleton or  
229 small cell cluster – the prediction is for coexistence of the two strains.

230         These results provide a clear view into the population dynamics of phage resistance in biofilms  
231 with microscopic resolution of the underlying cell-cell and cell-phage interactions; they also draw an  
232 analogy between phage ‘epidemics’ on the sub-millimeter scale of biofilms and the process of herd  
233 immunity studied for decades at much larger spatial scales in populations of plants and animals (42–44).  
234 When enough of the population is resistant, a spreading pathogen is no longer able to establish sufficient  
235 infections to amplify itself, and the susceptible portion of the population is protected (42). These  
236 observations in turn have several general implications. We anticipate that the arms race of phage attack  
237 and host defense can have a very different landscape in biofilms compared with planktonic populations  
238 (2, 5, 7, 19, 45). A rich history of research has shown that phages can rapidly eliminate susceptible host  
239 cell populations in mixed liquid culture, leading to strong selection for phage resistance (2–4, 46). In  
240 biofilms, by contrast, our results predict widespread and easily maintained polymorphism in phage  
241 resistance ability. This kind of standing variation can arise due to minority advantage (i.e., kill-the-winner)  
242 mechanisms (47–50), in which phages or other parasites are selected to target the most abundant  
243 constituent strains of a population.

244         The mechanism we describe here is distinct from kill-the-winner based selection, but  
245 complementary: susceptible cells in the minority are unlikely to be exposed to phages in the first place,  
246 as they are usually shielded by resistant cells blocking phage diffusion. The arms race between phages  
247 and host bacteria, therefore, is likely to take different evolutionary trajectories that move at slower speeds  
248 than those typically observed in liquid culture. This outcome echoes results observed in the early phage-  
249 host coevolution literature, where it found that for bacteria that form ‘wall populations’ on the inside of  
250 shaken liquid culture tubes, phage-susceptible bacteria survive at much higher rates than in the well-  
251 mixed planktonic phase (51). These wall populations are now known as biofilms, and here we have  
252 visualized the spatial protection process that allows susceptible cells to survive where otherwise they  
253 would not.



254 Our observations also bear on the efficacy of phage therapies, for which one of the most  
255 promising potential benefits is selective elimination of target pathogens from a community of otherwise  
256 commensal or beneficial microbes (12, 27, 49, 52, 53). This is a particularly compelling advantage  
257 relative to broad-spectrum antibiotics that can kill off not just the target pathogen but also many other  
258 members of a patient's microbiota, sometimes with severe side effects (54). Our work suggests that while  
259 it might be possible to completely eliminate target bacteria with lytic phages from a mixed population, the  
260 success of this approach depends heavily on the community composition and spatial structure. Phage-  
261 susceptible cells can be much harder to target and can coexist with resistant cells due to the protective  
262 effects of phage sequestration in mixed biofilms. It should be noted, however, that our work here only  
263 examines two strains of the same species, and whether these conclusions apply to multi-species  
264 consortia (55), whose biofilm architectures can differ substantially, is an important topic for further work.

265 The models developed here do not address the possibility of refuges created by quiescent  
266 bacteria in the basal layers of biofilms where nutrients have been depleted (45). This did not appear to  
267 be an important feature of our experimental biofilms, which agreed well with simulation predictions.  
268 However, quiescent cells could potentially be significant in other conditions, especially for cell groups that  
269 accumulate thicker mats with large, nutrient-starved populations in their interior. We also do not  
270 implement ongoing mutations in the different bacterial and phage strains residing in biofilms, using  
271 instead strains that are fixed in either the phage-susceptible or -resistant state to examine short term  
272 population dynamics. This approach allows us to infer the short-term evolutionary dynamics, but does  
273 not address the possibility of bacteria harboring different degrees of phage resistance bearing different  
274 fitness costs, or different mechanisms of phage resistance that could interact in unanticipated ways (such  
275 as abortive infections (10), or CRISPR adaptive immunity (56)). Lastly, and importantly, we omitted from  
276 our simulations and experiments the possibility of lysogenic infections, in which the phage genome is  
277 inserted to the chromosome of the host organism, emerging to replicate and produce new phages when  
278 the host is under duress. Lysogenic phages present a wide diversity of potential outcomes, especially  
279 considering that they can impart new phenotypes to their bacterial hosts. Tackling the challenge, both  
280 theoretically and experimentally, of how lysogenic phages enter, alter, and evolve within multispecies  
281 microbial communities is an important area for future work.

282

### 283 **Author Contributions**

284 CDN conceived and supervised the project; CDN and VB designed simulations and experiments. MS  
285 developed the simulation framework and performed simulation data collection. MCB performed  
286 experiments and image processing of microscopy data. MKS, MCB, BK, KD, VB, and CDN analyzed and  
287 interpreted data. MKS, MCB, BK, KD, VB, and CDN wrote the paper.

288

## 289 **Acknowledgements**

290 We are grateful to Will Harcombe, Wolfram Möbius, Ben Wucher, Swetha Kasetty, and Sara Mitri for  
291 comments on earlier versions of the manuscript. MCB is supported by a GANN Fellowship from  
292 Dartmouth College. KD is supported by the European Research Council (StG-716734), the Deutsche  
293 Forschungsgemeinschaft (SFB 987), and the Behrens-Weise-Foundation. VB is supported by NSF ABI  
294 1458347), NSF MCB 1817342, and a UMass President Science and Technology award. CDN is  
295 supported by the National Science Foundation MCB 1817342, a Burke Award from Dartmouth College,  
296 a pilot award from the Cystic Fibrosis Foundation (STANTO15RO), NIH grant P30-DK117469, and NIH  
297 grant P20-GM113132 to the Dartmouth BioMT COBRE.

298

299

## 300 **References**

- 301 1. Susskind MM, Botstein D (1978) Molecular genetics of bacteriophage P22. *Microbiol Rev*  
302 42(2):385–413.
- 303 2. Koskella B, Brockhurst MA (2014) Bacteria–phage coevolution as a driver of ecological and  
304 evolutionary processes in microbial communities. *Fems Microbiol Rev* 38(5):916–931.
- 305 3. Lenski RE, Levin BR (1985) Constraints on the coevolution of bacteria and virulent phage: a model,  
306 some experiments, and predictions for natural communities. *Am Nat*:585–602.
- 307 4. Chao L, Levin BR, Stewart FM (1977) A Complex Community in a Simple Habitat: An Experimental  
308 Study with Bacteria and Phage. *Ecology* 58(2):369–378.
- 309 5. Brockhurst MA, Buckling A, Rainey PB (2006) Spatial heterogeneity and the stability of host-  
310 parasite coexistence. *J Evol Biol* 19(2):374–379.
- 311 6. Harrison E, Laine A-L, Hietala M, Brockhurst MA (2013) Rapidly fluctuating environments constrain  
312 coevolutionary arms races by impeding selective sweeps. *Proc R Soc B* 280(1764):20130937.
- 313 7. Brockhurst MA, Buckling A, Rainey PB (2005) The effect of a bacteriophage on diversification of  
314 the opportunistic bacterial pathogen, *Pseudomonas aeruginosa*. *Proc R Soc B* 272(1570):1385–  
315 1391.
- 316 8. Abedon ST (2008) Bacteriophage Ecology: Population Growth, Evolution, and Impact of Bacterial  
317 Viruses.
- 318 9. Abedon ST (2011) *Bacteriophages and Biofilms* (Nova Science).
- 319 10. Labrie SJ, Samson JE, Moineau S (2010) Bacteriophage resistance mechanisms. *Nat Rev Micro*  
320 8(5):317–327.
- 321 11. Samson JE, Magadan AH, Sabri M, Moineau S (2013) Revenge of the phages: defeating bacterial  
322 defences. *Nat Rev Micro* 11(10):675–687.
- 323 12. Levin BR, Bull JJ (2004) Population and evolutionary dynamics of phage therapy. *Nat Rev*  
324 *Microbiol* 2(2):166–173.
- 325 13. Weitz JS, et al. (2013) Phage–bacteria infection networks. *Trends Microbiol* 21(2):82–91.
- 326 14. Flemming H-C, Wingender J (2010) The biofilm matrix. *Nat Rev Microbiol* 8:623–633.
- 327 15. Flemming H-C, et al. (2016) Biofilms: an emergent form of bacterial life. *Nat Rev Microbiol*  
328 14(9):563–575.
- 329 16. Nadell CD, Drescher K, Foster KR (2016) Spatial structure, cooperation, and competition in  
330 bacterial biofilms. *Nat Rev Microbiol* 14:589–600.
- 331 17. Darch SE, et al. (2017) Phage Inhibit Pathogen Dissemination by Targeting Bacterial Migrants in

- 332 a Chronic Infection Model. *MBio* 8(2):e00240-17.
- 333 18. Vidakovic L, Singh PK, Hartmann R, Nadell CD, Drescher K (2018) Dynamic biofilm architecture  
334 confers individual and collective mechanisms of viral protection. *Nat Microbiol* 3:26–31.
- 335 19. Davies E V, et al. (2016) Temperate phages both mediate and drive adaptive evolution in pathogen  
336 biofilms. *Proc Natl Acad Sci* 113(29):8266–8271.
- 337 20. Stewart PS, Franklin MJ (2008) Physiological heterogeneity in biofilms. *Nat Rev Microbiol*  
338 6(3):199–210.
- 339 21. Stewart PS (2012) Mini-review: Convection around biofilms. *Biofouling* 28(2):187–198.
- 340 22. Mah T-FC, O’Toole GA (2001) Mechanisms of biofilm resistance to antimicrobial agents. *Trends*  
341 *Microbiol* 9(1):34–39.
- 342 23. Tseng BS, et al. (2013) The extracellular matrix protects *Pseudomonas aeruginosa* biofilms by  
343 limiting the penetration of tobramycin. *Environ Microbiol* 15(10):2865–2878.
- 344 24. Chaudhry WN, et al. (2019) Mucoidy, a general mechanism for maintaining lytic phage in  
345 populations of bacteria. *bioRxiv* 775056.
- 346 25. Scanlan PD, Buckling A (2012) Co-evolution with lytic phage selects for the mucoid phenotype of  
347 *Pseudomonas fluorescens* SBW25. *ISME J* 6(6):1148–1158.
- 348 26. Abedon ST, Thomas-Abedon C (2010) Phage Therapy Pharmacology. *Curr Pharm Biotechnol*  
349 11(1):28–47.
- 350 27. Chan BK, Abedon ST (2012) Phage Therapy Pharmacology: Phage Cocktails. *Advances in*  
351 *Applied Microbiology, Vol 78*, eds Laskin AI, Sariaslani S, Gadd GM, pp 1–23.
- 352 28. Azeredo J, Sutherland IW (2008) The use of phages for the removal of infectious biofilms. *Curr*  
353 *Pharm Biotechnol* 9(4):261–266.
- 354 29. Sutherland IW, Hughes KA, Skillman LC, Tait K (2004) The interaction of phage and biofilms.  
355 *Fems Microbiol Lett* 232(1):1–6.
- 356 30. Simmons M, Drescher K, Nadell CD, Bucci V (2017) Phage mobility is a core determinant of  
357 phage–bacteria coexistence in biofilms. *Isme J* 12:531–543.
- 358 31. Eriksen RS, Svenningsen SL, Sneppen K, Mitarai N (2018) A growing microcolony can survive  
359 and support persistent propagation of virulent phages. *Proc Natl Acad Sci U S A* 115(2):337–342.
- 360 32. Chaudhry WN, et al. (2018) Leaky resistance and the conditions for the existence of lytic  
361 bacteriophage. *PLOS Biol* 16(8):e2005971.
- 362 33. Bull JJ, Vegge CS, Schmerer M, Chaudhry WN, Levin BR (2014) Phenotypic Resistance and the  
363 Dynamics of Bacterial Escape from Phage Control. *PLoS One* 9(4):e94690.
- 364 34. Xavier JB, Picioreanu C, van Loosdrecht M (2005) A general description of detachment for  
365 multidimensional modelling of biofilms. *Biotechnol Bioeng* 91(6):651–669.
- 366 35. Picioreanu C, van Loosdrecht MCM, Heijnen JJ (1998) A new combined differential-discrete  
367 cellular automaton approach for biofilm modeling: Application for growth in gel beads. *Biotechnol*  
368 *Bioeng* 57(6):718–731.
- 369 36. Nadell CD, et al. (2013) Cutting through the complexity of cell collectives. *Proc R Soc B*  
370 280(1755):20122770.
- 371 37. Siepielski AM, McPeck MA (2010) On the evidence for species coexistence: a critique of the  
372 coexistence program. *Ecology* 91(11):3153–64.
- 373 38. MacArthur R (1972) *Geographical Ecology* (Princeton University Press, Princeton, NJ).
- 374 39. Levin SA (1970) Community Equilibria and Stability, and an Extension of the Competitive Exclusion  
375 Principle. *Am Nat* 104(939):413–423.
- 376 40. Chesson P (2000) Mechanisms of Maintenance of Species Diversity. *Annu Rev Ecol Syst*  
377 31(1):343–366.
- 378 41. Qimron U, Marintcheva B, Tabor S, Richardson CC (2006) Genomewide screens for *Escherichia*  
379 *coli* genes affecting growth of T7 bacteriophage. *Proc Natl Acad Sci* 103(50):19039–19044.
- 380 42. Metcalf CJE, Ferrari M, Graham AL, Grenfell BT (2015) Understanding Herd Immunity. *Trends*  
381 *Immunol* 36(12):753–755.
- 382 43. Levin SA, Durrett R (1996) From individuals to epidemics. *Philos Trans R Soc B Biol Sci*

- 383 351(1347):1615–1621.
- 384 44. Levin SA (1992) The Problem of Pattern and Scale in Ecology: The Robert H. MacArthur Award  
385 Lecture. *Ecology* 73(6):1943–1967.
- 386 45. Heilmann S, Sneppen K, Krishna S (2012) Coexistence of phage and bacteria on the boundary of  
387 self-organized refuges. *Proc Natl Acad Sci U S A* 109(31):12828–12833.
- 388 46. Levin BR, Stewart FM, Chao L (1977) Resource-Limited Growth, Competition, and Predation: A  
389 Model and Experimental Studies with Bacteria and Bacteriophage. *Am Nat* 111(977):3–24.
- 390 47. Díaz-Muñoz SL, Koskella B (2014) Bacteria-phage interactions in natural environments. *Adv Appl  
391 Microbiol* 89(135):10.1016.
- 392 48. Koskella B, Thompson JN, Preston GM, Buckling A (2011) Local biotic environment shapes the  
393 spatial scale of bacteriophage adaptation to bacteria. *Am Nat* 177(4):440–451.
- 394 49. Koskella B, Meaden S, Koskella B, Meaden S (2013) Understanding Bacteriophage Specificity in  
395 Natural Microbial Communities. *Viruses* 5(3):806–823.
- 396 50. Kunin V, et al. (2008) A bacterial metapopulation adapts locally to phage predation despite global  
397 dispersal. *Genome Res* 18(2):293–7.
- 398 51. Schrag SJ, Mittler JE (1996) Host-Parasite Coexistence: The Role of Spatial Refuges in Stabilizing  
399 Bacteria-Phage Interactions. *Am Nat* 148(2):348–377.
- 400 52. Levin BR, Bull JJ (1996) Phage therapy revisited: The population biology of a bacterial infection  
401 and its treatment with bacteriophage and antibiotics. *Am Nat* 147(6):881–898.
- 402 53. Sillankorva S, Neubauer P, Azeredo J (2010) Phage control of dual species biofilms of  
403 *Pseudomonas fluorescens* and *Staphylococcus lentus*. *Biofouling* 26(5):567–575.
- 404 54. Buffie CG, et al. (2012) Profound Alterations of Intestinal Microbiota following a Single Dose of  
405 Clindamycin Results in Sustained Susceptibility to *Clostridium difficile*-Induced Colitis. *Infect  
406 Immun* 80(1):62–73.
- 407 55. Harcombe WR, Bull JJ (2005) Impact of phages on two-species bacterial communities. *Appl  
408 Environ Microbiol* 71(9):5254–9.
- 409 56. Salmond GPC, Fineran PC (2015) A century of the phage: past, present and future. *Nat Rev Micro  
410* 13:777–786.
- 411 57. Guyer JE, Wheeler D, Warren JA (2009) FiPy: Partial Differential Equations with Python. *Comput  
412 Sci Eng* 11(3):6–15.
- 413 58. Xavier JB, Picioreanu C, van Loosdrecht MCM (2005) A framework for multidimensional modelling  
414 of activity and structure of multispecies biofilms. *Environ Microbiol* 7(8):1085–1103.
- 415 59. Lardon LA, et al. (2011) iDynoMiCS: next-generation individual-based modelling of biofilms.  
416 *Environ Microbiol* 13(9):2416–2434.
- 417 60. Bucci V, Hoover S, Hellweger FL (2012) Modeling Adaptive Mutation of Enteric Bacteria in Surface  
418 Water Using Agent-Based Methods. *Water, Air, Soil Pollut* 223(5):2035–2049.
- 419 61. Hellweger FL, Bucci V (2009) A bunch of tiny individuals-Individual-based modeling for microbes.  
420 *Ecol Modell* 220(1):8–22.
- 421 62. Bucci V, Nadell CD, Xavier JB (2011) The evolution of bacteriocin production in bacterial biofilms.  
422 *Am Nat* 178(6):E162–E173.
- 423 63. Nadell CD, Foster KR, Xavier JB (2010) Emergence of spatial structure in cell groups and the  
424 evolution of cooperation. *PLoS Comput Biol* 6(3):e1000716.
- 425 64. Hallatschek O, Hersen P, Ramanathan S, Nelson DR (2007) Genetic drift at expanding frontiers  
426 promotes gene segregation. *Proc Natl Acad Sci USA* 104(50):19926–19930.
- 427 65. Datsenko KA, Wanner BL (2000) One-step inactivation of chromosomal genes in *Escherichia coli*  
428 K-12 using PCR products. *Proc Natl Acad Sci U S A* 97(12):6640–5.
- 429 66. Weibel DB, DiLuzio WR, Whitesides GM (2007) Microfabrication meets microbiology. *Nat Rev  
430 Microbiol* 5(3):209–218.
- 431 67. Sia SK, Whitesides GM (2003) Microfluidic devices fabricated in poly(dimethylsiloxane) for  
432 biological studies. *Electrophoresis* 24:3563–3576.
- 433 68. Bonilla N, et al. (2016) Phage on tap—a quick and efficient protocol for the preparation of



- 434 bacteriophage laboratory stocks. *PeerJ* 4:e2261.
- 435 69. Drescher K, Nadell CD, Stone HA, Wingreen NS, Bassler BL (2014) Solutions to the Public Goods  
436 Dilemma in Bacterial Biofilms. *Curr Biol* 24(1):50–55.
- 437 70. Nadell CD, Drescher K, Wingreen NS, Bassler BL (2015) Extracellular matrix structure governs  
438 invasion resistance in bacterial biofilms. *ISME J* 9:1700–1709.
- 439 71. McCarty PL (2012) *Environmental biotechnology: principles and applications* (Tata McGraw-Hill  
440 Education).
- 441 72. Stewart P (2003) Diffusion in Biofilms. *J Bacteriol* 185(5):1485–1491.
- 442 73. Henze M, Grady Jr CPL, Gujer W, Marais GVR, Matsuo T (1987) Activated sludge model no. 1:  
443 lawprc scientific and technical report no. 1. *IAWPRC, London*.
- 444 74. Henze M, et al. (1999) Activated Sludge Model No.2d, ASM2d. *Water Sci Technol* 39(1):165–182.
- 445 75. Oliveira CS, et al. (2009) Determination of kinetic and stoichiometric parameters of *Pseudomonas*  
446 *putida* F1 by chemostat and in situ pulse respirometry. *Chem Prod Process Model* 4(2).
- 447 76. Loferer-Krößbacher M, Klima J, Psenner R (1998) Determination of Bacterial Cell Dry Mass by  
448 Transmission Electron Microscopy and Densitometric Image Analysis. *Appl Environ Microbiol*  
449 64(2):688–694.
- 450 77. Lapidou CS, Rittmann BE (2002) Non-steady state modeling of extracellular polymeric  
451 substances, soluble microbial products, and active and inert biomass. *Water Res* 36(8):1983–  
452 1992.
- 453 78. Narang A, Konopka A, Ramkrishna D (1997) New patterns of mixed-substrate utilization during  
454 batch growth of *Escherichia coli* K12. *Biotechnol Bioeng* 55(5):747–757.
- 455 79. Beg QK, et al. (2007) Intracellular crowding defines the mode and sequence of substrate uptake  
456 by *Escherichia coli* and constrains its metabolic activity. *Proc Natl Acad Sci* 104(31):12663–12668.
- 457 80. Trojanowicz K, Styka W, Baczynski T (2009) Experimental determination of kinetic parameters for  
458 heterotrophic microorganisms in biofilm under petrochemical wastewater conditions. *Polish J*  
459 *Environ Stud* 18(5).
- 460 81. Lapidou CS, Rittmann BE (2004) Modeling the development of biofilm density including active  
461 bacteria, inert biomass, and extracellular polymeric substances. *Water Res* 38(14–15):3349–3361.
- 462 82. Esquivel-Rios I, et al. (2014) A microrespirometric method for the determination of stoichiometric  
463 and kinetic parameters of heterotrophic and autotrophic cultures. *Biochem Eng J* 83:70–78.
- 464 83. Abedon ST (2009) Kinetics of Phage-Mediated Biocontrol of Bacteria. *Foodborne Pathog Dis*  
465 6(7):807–815.
- 466

467  
468

## Figures

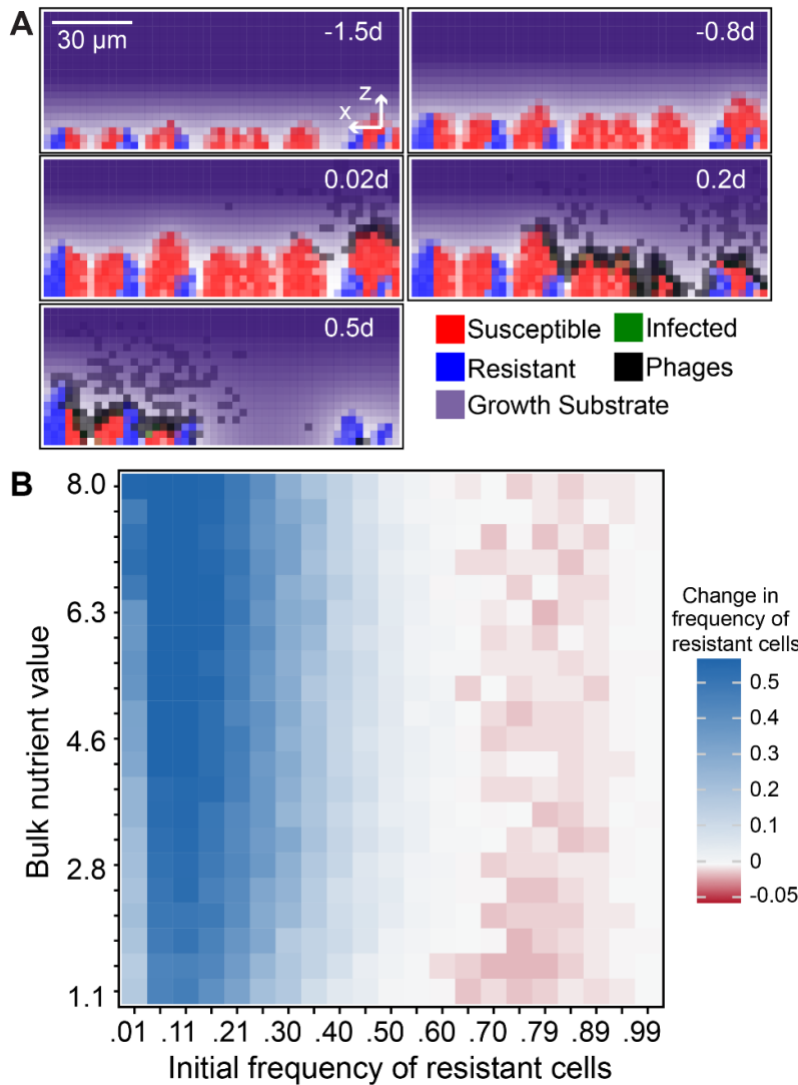

469

470

471

472

473

474

475

476

477

478

479

480

481

482

**Figure 1. Simulated outcomes of phages exposed to biofilms composed of resistant and susceptible cells.** (A) Example time series in which biofilms of phage-resistant and phage-susceptible cells are allowed to reach a critical height before introduction of phages at one location along the biofilm surface (varying the initial biofilm height and phage introduction procedure are explored in Figure S3). Phages can adsorb to resistant cells but cannot amplify within them, and phages that have departed the biofilm - if they do not re-infect within the next time step - are assumed to be removed by fluid advection. (B) Summary heatmap of the effect of biofilm structure on selection for phage resistance. In the heatmap, simulation outcomes are shown for varying degrees of nutrient availability (which controls the baseline host growth rate) and initial resistant strain frequency. Here both phage mobility and removal rate from the liquid phase are intermediate, and the bacterial fitness cost of phage resistance is 5% of the maximum growth rate (see Figure S1 for extensive exploration of these factors). Resistant cells increase in frequency when initially uncommon (blue squares in heatmap), but when they are initially common, their relative abundance either stays the same (white squares) or decreases (red squares).



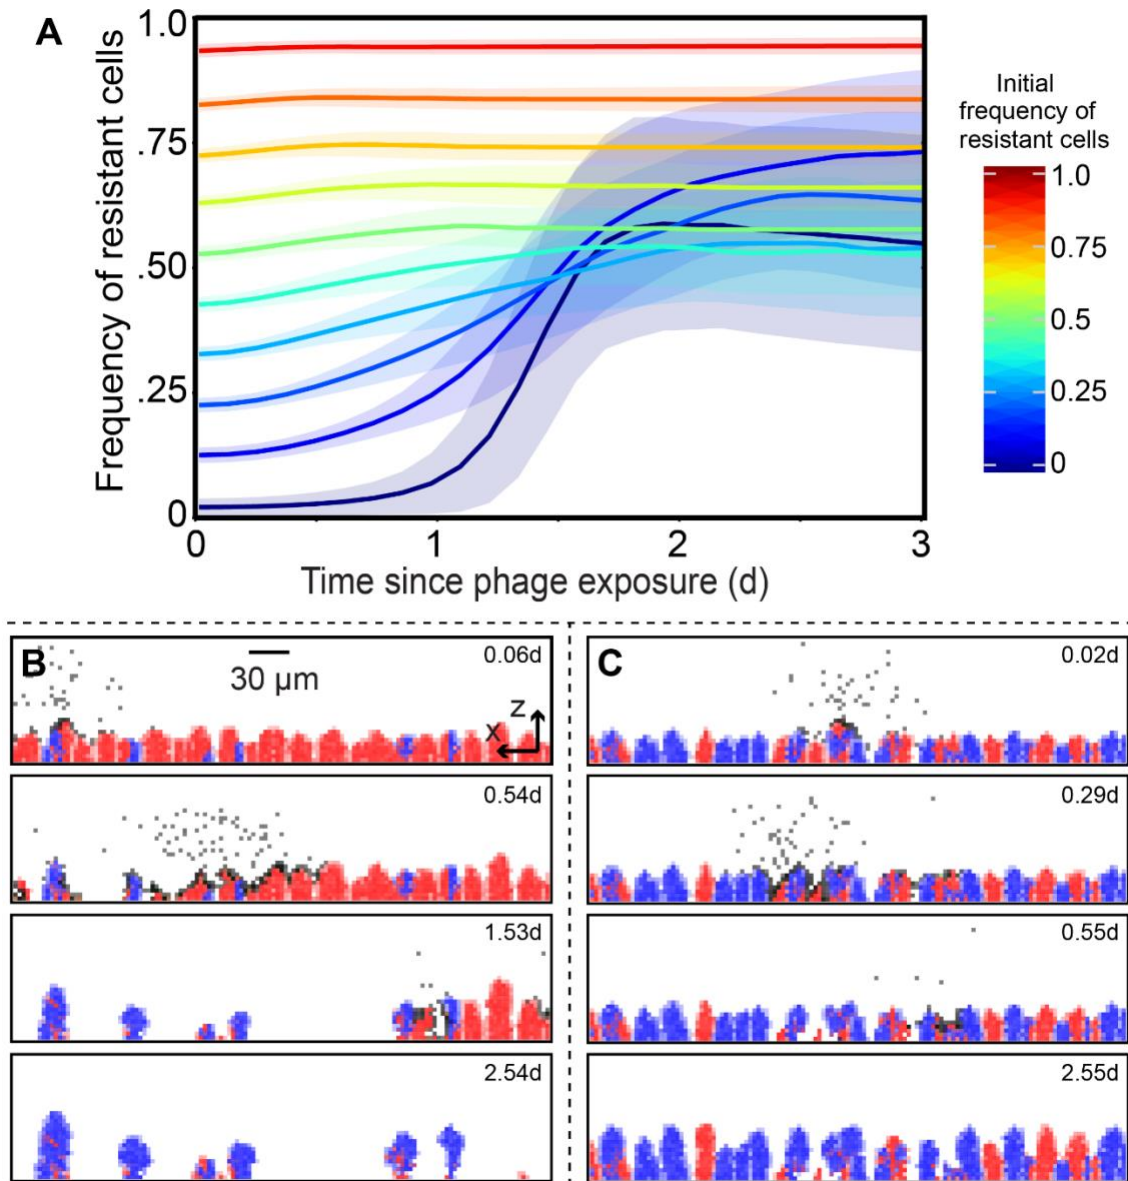

483  
484

485 **Figure 2. Simulated population dynamics of phage-resistant and susceptible bacteria within**  
486 **biofilms.** These dynamics underlie the competition outcomes in Figure 1. (A) The frequency of resistant  
487 cells is shown in traces colored according to their initial frequency, with the standard deviation across all  
488 replicate runs as transparent blue regions around each trace ( $n = 90-100$  replicate simulations per trace).  
489 (B) When resistant cells are initially a minority, susceptible cells are exposed to phages and largely killed  
490 off, allowing resistant cells to re-seed the population and markedly increase in relative abundance relative  
491 to the strain ratio prior to phage exposure. (C) When resistant cells are initially more common, and phages  
492 cannot diffuse freely through the biofilm, susceptible cells are spatially protected from phage exposure  
493 because phages are sequestered in clusters of resistant cells.

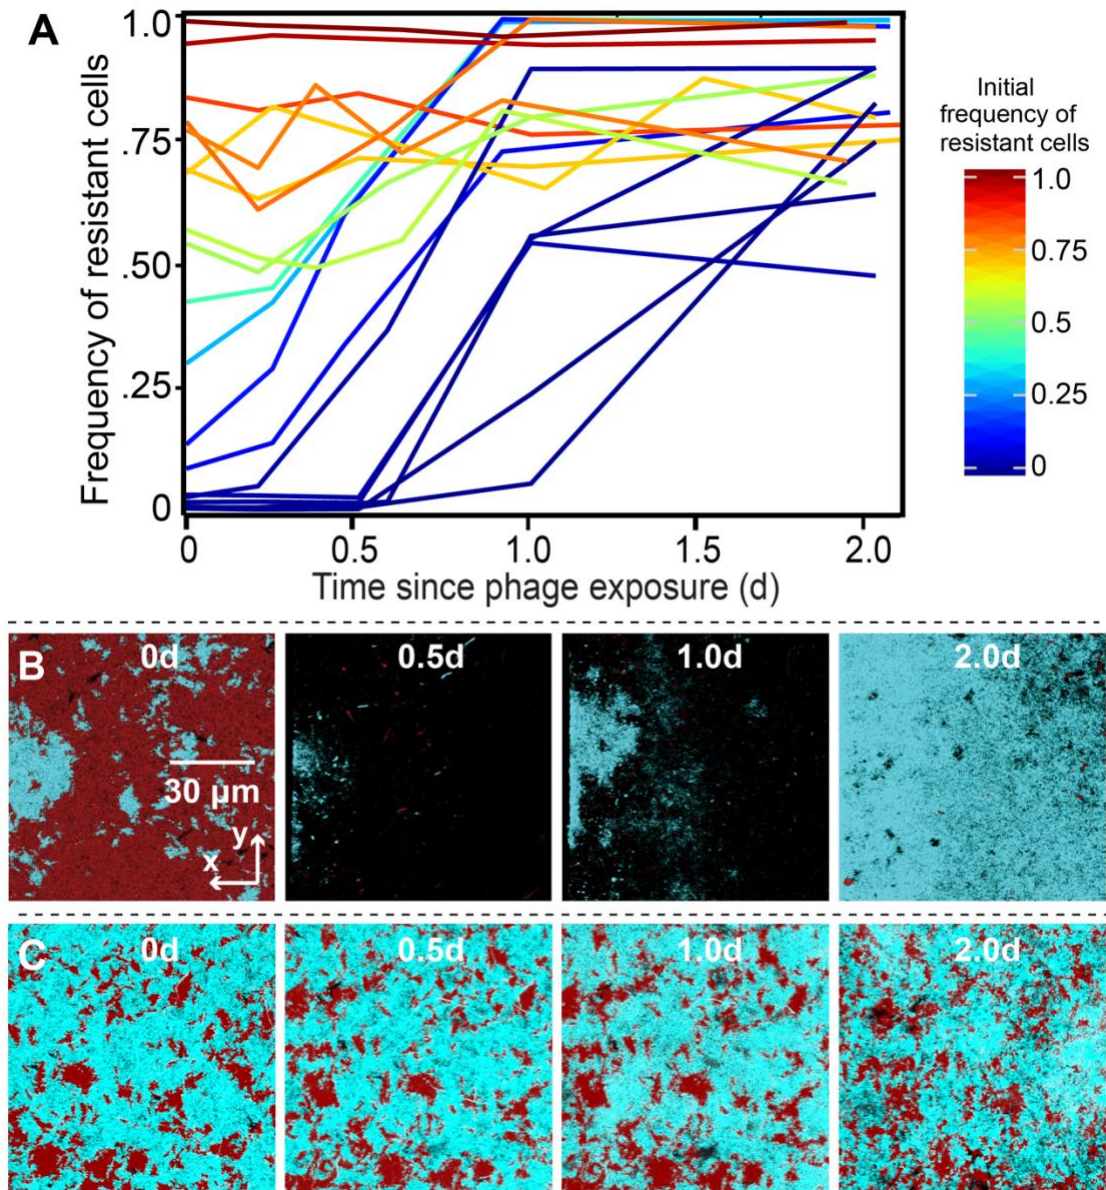

494

495

496 **Figure 3. Experimental test of model predictions for phage-biofilm coexistence.** Biofilms containing  
497 mixtures of phage T7-susceptible AR3110 *E. coli* and a phage T7-resistant mutant carrying a deletion of  
498 *trxA* were grown for 48 hours before administering a pulse of phages to the two-strain biofilm population.  
499 The frequency of resistant cells is shown in traces colored according to their initial frequency, where each  
500 trace is an independent run of the experiment. (A) Population dynamics traces showing the frequency of  
501 phage-resistant *E. coli* as a function of its initial population frequency. Each trace is a single replicate of  
502 the experiment, with varying initial ratios of the two strains as in our simulations (B, C) Time series of  
503 phage-resistant (blue) and phage-susceptible cells (red) following a pulse of phages into the chambers.  
504 Panels from left to right show biofilms at ~ 0, 0.5, 1, and 2 days after phage exposure. Each image is an  
505 x-y optical section from a stack of images covering the whole biofilm volume, taken by confocal  
506 microscopy.

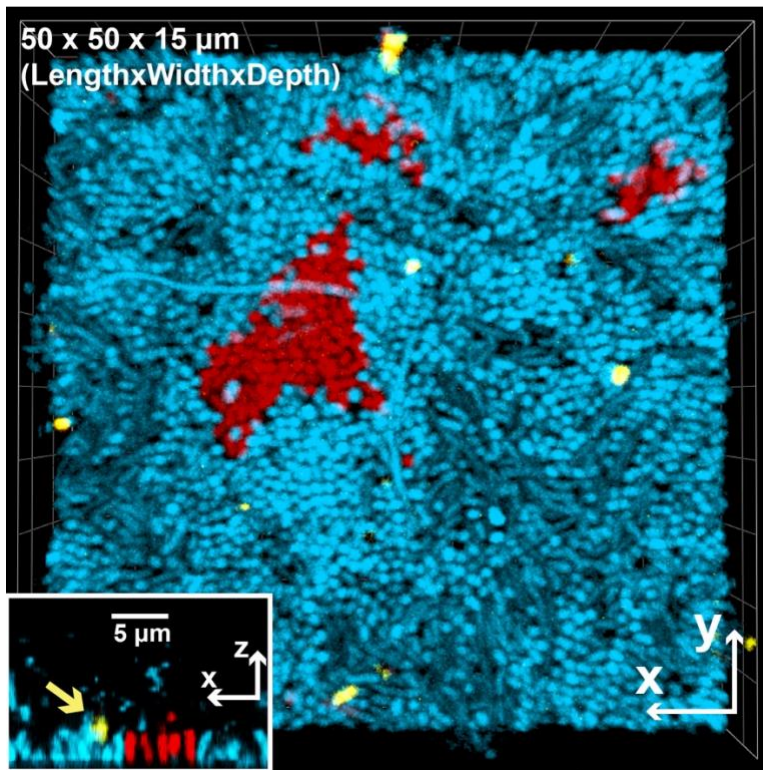

507

508

509

510

511

512

513

514

515

516

517

**Figure 4. Experimental demonstration of phage sequestration within clusters of phage-resistant bacteria (blue) in a mixed-strain biofilm with phage-susceptible bacteria (red).** Purified phages stained with Alexafluor-633 (shown in yellow) were added to 48 h biofilms in which resistant cells were inoculated as 95% of the founding population. The central image is a top-down view of a 3-D rendering measuring 50μm x 50μm x 15 μm [L x W x D]. The inset image is a 2-D projection of a vertical slice through a 3-D volume. The yellow arrow points to an immobilized phage on a cluster of resistant cells. Note that phages are much smaller than the minimum resolvable volume of a confocal fluorescence microscope like that used here; as a result of this effect and the fact that their Alexafluor-633 tag is very bright, the phages appear larger than their true size.



518 **Supplemental Information**

519

520 **Biofilm structure promotes coexistence of phage-resistant**  
521 **and phage-susceptible bacteria**

522

523 Matthew Simmons<sup>1,2†</sup>, Matthew C. Bond<sup>2†</sup>, Britt Koskella<sup>3</sup>, Knut Drescher<sup>4,5</sup>, Vanni Bucci<sup>1\*</sup>,  
524 Carey D. Nadell<sup>2\*</sup>

525

526 <sup>1</sup> Department of Bioengineering, Program in Biotechnology and Biomedical Engineering, University of  
527 Massachusetts Dartmouth, N. Dartmouth, MA 02747, USA

528

529 <sup>2</sup> Department of Biological Sciences, Dartmouth, Hanover, NH 03755, USA

530

531 <sup>3</sup> Department of Integrative Biology, University of California, Berkeley, Berkeley, CA 94720, USA

532

533 <sup>4</sup> Max Planck Institute for Terrestrial Microbiology, D-35043 Marburg, Germany

534

535 <sup>5</sup> Department of Physics, Philipps-Universität Marburg, D-35032 Marburg, Germany

536

537 <sup>6</sup> Department of Microbiology and Physiological Systems, University of Massachusetts Medical School,  
538 Worcester, MA 01605, USA

539

540

541

542

543 † Co-first authors

544

545 \* Authors for correspondence:

546

547 Carey Nadell ([carey.d.nadell@dartmouth.edu](mailto:carey.d.nadell@dartmouth.edu))

548 Vanni Bucci ([vanni.bucci@2@umassmed.edu](mailto:vanni.bucci@2@umassmed.edu))

549

## 550 **Materials and Methods**

### 551 **Phage-biofilm modeling simulation framework:**

552 The simulation framework used for this study is an updated and expanded version of a modeling  
553 approach developed in Simmons et al. (30). The major changes include a new implementation of bacteria  
554 as individual particles rather than a homogeneous biomass, and a new implementation of phage diffusion,  
555 detailed below. The simulations are built on a grid-based approach for tracking bacteria, phages, and  
556 solute concentrations; spatial structure in the system is thus resolved at the level of grid nodes (which  
557 are  $3\mu\text{m} \times 3\mu\text{m}$  for the simulations described in this paper). Within a grid node, bacteria and phages are  
558 tracked individually but assumed to interact randomly. Using the FiPy partial differential equation solver  
559 for Python (57), the same grid system is used to calculate nutrient diffusion from a bulk layer above the  
560 biofilm toward the cell group surface, where it is consumed by bacteria (35, 58, 59).

561 As a result of nutrient consumption on the biofilm's advancing front (Figure 1A) nutrient gradients  
562 are created with high nutrient availability in the outer cell layers and lower nutrient availability with  
563 increasing depth into the biofilm interior. Cells near the liquid interface grow maximally, while cells deeper  
564 in the biofilm interior grow relatively slowly. Fluid flow is modeled implicitly; following prior literature, we  
565 allow the biofilm to erode along its outer front at a rate proportional to the square of the distance from the  
566 basal substratum (described in detail in Simmons et al. (30)). Further, any phages that depart from the  
567 biofilm into the surrounding liquid are advected out of the simulation space within one iteration cycle,  
568 which is approximately 7-8 minutes in simulation time (see below).

569 The simulation framework was written in an object-oriented style. A simulation object is defined  
570 *via* the space of the system, number and properties of implemented grid node containers, biological  
571 behaviors of bacteria and phages, one-time events (e.g. phage pulse), and simulation exit conditions.  
572 Briefly, the space of the system specifies physical information such as physical size and length scale of  
573 the grid node array in which cells, phages, and solutes are implemented. The containers hold the  
574 information about each modeled individual present in the system. Behaviors describe a container's  
575 interactions with anything else including other containers, space, or time. Events are one-time-use  
576 behaviors including the inoculation of the system with bacteria or pulses of phages into the simulation  
577 space.

578  
579 Simulations were initiated by first defining the types of container contents, including both bacterial  
580 strains/species of interest (phage-susceptible and phage-resistant), phage-infected bacteria, phages,  
581 and the growth substrate as a solute. This process includes specifying values for basic biological and  
582 physical parameters in the system (e.g. bacterial growth rate, phage infection rate per host-virus contact,  
583 phage lag time, phage burst size, nutrient diffusivity, and others; the full list of parameter values and their  
584 measurement origins is provided in Table S1). After containers are established in each simulation  
585 instance, the simulation proceeds through inoculation of the two bacterial species on the substratum.  
586 Phages were not introduced at the outset of simulations but rather at a set time after bacteria were  
587 permitted to grow, as described in the main text. Simulations proceed along the following cycle of steps:

- 588 1. diffusion of the nutrient substrate,
- 589 2. biomass growth and division,
- 590 3. lysis of infected bacteria,
- 591 4. erosion of biomass,
- 592 5. phage movement,
- 593 6. detachment of biomass,

- 594 7. phage infection,  
595 8. biofilm relaxation ('shoving'),  
596 9. detachment of bacteriophage.

597

598 **Phage mobility implementation:** All processes describing phage-bacteria dynamics are equivalent to  
599 those presented in Simmons et al. (30) with one exception pertaining to the methods of computing phage  
600 entry and exit from the biofilm bacterial volume. This new approach is described in detail below.

601 Previously, we analytically solved the diffusion equation to approximate the phage density as a  
602 function of location in the biofilm. Here, in order to accommodate for possible biological heterogeneity in  
603 bacteriophage dynamics (60, 61), we introduced an algorithm for calculating phage movement by  
604 modeling each phage's individual Brownian motion as a random walk. To account for the effect of the  
605 biofilm matrix on phage movement, we introduced a new model parameter (the interaction rate,  $I$ )  
606 controlling the diffusivity of phages through areas of simulation space occupied by bacterial biomass (30).  
607 We also introduce a rate of removal ( $\delta_p$ ) which accounts for the removal of the phage due to the advection  
608 of the system during the phage's motion through the space off of the biofilm, scaling with the square of  
609 the distance away from the biofilm. There is an additional implicit advective removal of bacteriophage at  
610 the end of the iteration (step 9 above) where any phages remaining off biofilm are removed from the  
611 space via advection.

612 The improved implementation of phage mobility operates as follows. For each phage: We first  
613 calculate the number of potential steps that could be taken in the next time interval as:  $n =$   
614  $D_p dt / (2 dl^2)$ , and the time of these steps as  $dt_p = 2 dl^2 / D_p$ , where  $dl$  is the grid length scale,  $D_p$   
615 is the diffusivity of the phage, and  $dt$  is the simulation time step. Next for each step in  $n$ : 1) If the phage is  
616 off the biofilm, determine whether the phage is removed from advection with probability  $p = 1 - e^{-dt_p d^2 \delta_p}$ ,  
617 where  $d$  is the distance away from the biofilm. 2) Next choose a target node by randomly choosing  
618 direction. The probability to remain in the current grid node depends on the number of dimensions (See  
619 calculation of phage diffusion properties, below). 3) Determine whether the phage is able to diffuse into  
620 the target grid location with probability  $p = 1 - e^{-dt_p \Sigma I_t + I_s}$ , where  $I_t$  is the interaction rate at the target grid  
621 node, and  $I_s$  is the interaction rate at the source node, and we sum over all biomass in those nodes. 4)  
622 Finally, if the phage has interacted with biomass, cease motion. If it has not, move the phage to the target  
623 grid node. As the interaction rate,  $I$ , increases, the ability of the phage to diffuse through biomass  
624 decreases (e.g.,  $p$  tends to 1), which is a per-individual-phage representation of the phage impedance  
625 parameter previously described by Simmons et al. (30). Once the phage stops moving, we evaluate the  
626 remaining time as  $dt \times s/n$ , where  $s$  is the number of steps taken, from 0 to  $n$ , and use it in the infection  
627 step.

628

629 **Calculation of phage diffusion properties:** The model for an individual phage taking a step across the  
630 grid nodes is that it must diffuse a large enough distance from a grid node. The unnormalized probability  
631 density of diffusing within in one place can be described by the solution of the diffusion equation in radial  
632 coordinates:  $e^{-r^2/(a dt_p D_p)}$ . Here  $r$  indicates the distance away from the starting point,  $a$  is a constant  
633 indicating dimension:  $a = 1$  for two dimensions and  $a = 4$  for three dimensions, while other terms are  
634 explained above. To get the probability of remaining in a radius  $\rho$ , we integrate from  $0 \rightarrow \rho$  over  $r$  with a  
635 normalization factor which is an integration over all space ( $\int_0^\infty e^{-r^2/(a dt_p D_p)}$ ). Letting  $\rho = \frac{dl}{\sqrt{\pi}}$  gives a circle  
636 whose area is equal to the area of a grid node, and noting that  $dt_p = 2 dl^2 / D_p$ , the integration yields



637  $\operatorname{erf}\left(\frac{1}{\sqrt{2a\pi}}\right)$ , or  $p = 0.42$  in two dimension and  $p = 0.22$  in three dimensions.

638

639 **Details on simulation initial conditions and execution of parameter sweeps:** Where possible,  
640 biological and physical parameters of the simulation system were constrained according to  
641 experimentally measured values for *E. coli* and phage T7, which were the focal species of our  
642 experiments as well (see Table S1). Following our previous biofilm dynamics simulation work (30, 36,  
643 62), each simulation starts with an initial ratio of phage-susceptible and -resistant strains on the solid  
644 substratum, and these two strains compete for access to space and growth-limiting nutrients that diffuse  
645 from a bulk layer above the biofilm. When the biofilm height reaches  $30\mu\text{m}$ , (approximately 7 days for the  
646 lowest condition and 1 day for the highest), a pulse of bacteriophages to the highest point of susceptible  
647 biomass, simulating an individual cell bursting, releasing bacteriophages. Repeating our simulation  
648 parameter sweeps with earlier ( $20\mu\text{m}$  biofilm height) or later ( $50\mu\text{m}$  biofilm height) phage inoculation had  
649 no effect on the qualitative outcomes. Two phage inoculation methods were tested. The first approach to  
650 phage inoculation was a 120-virion pulse at a single position at highest point of susceptible biomass in  
651 the biofilm. The second was a “spray” of phages in the area just above the biofilm outer surface: 300  
652 phages are added to randomly selected grid nodes  $9\mu\text{m}$  above the biofilm. Data reported in Figure 1  
653 correspond to simulations obtained using the first method, but we confirmed that the core results are  
654 upheld when using the “spray” method of phage inoculation.

655 Simulations were run until one of two different exit conditions was reached: either bacterial  
656 species going to fixation, or the simulation ran to a pre-specified end point (time of infection + 10 days).  
657 Simulations were run for 21 different nutrient bulk values corresponding to an approximate time of  
658 infection at 1 through 7 days, where the faster growth has slightly greater strain mixing (63, 64). The initial  
659 resistant strain frequency also varied from 1% to 99% in 21 steps. Additional simulations were run also  
660 for three distinct fitness cost levels of phage resistance, and for three different values of the interaction  
661 rate parameter  $I$ , which effectively varied phage mobility through biofilms easily penetrating the biofilm  
662 surface to severely impeded immediately upon biofilm contact (see main text). We ran 100 simulations  
663 with different random seeds to completion for each combination of parameters in the main text.  
664 Simulations which had a maximum number of phages in any particular iteration of less than 150 were  
665 excluded from the analysis, resulting in over 90 simulations for each set in the main text. For the well-  
666 mixed control simulations, we disabled all spatially dependent behaviors: substrate diffusion, biomass  
667 erosion, biofilm detachment, biofilm relaxation, phage detachment.

668

669

## 670 **Experimental Materials and Methods:**

671 **Bacterial Strains.** Both strains used in this study are *E. coli* AR3110 derivatives, created using the  
672 lambda red method for chromosomal modification (65). The  $\Delta\text{trxA}$  deletion strain was created by  
673 amplifying the locus encoding chloramphenicol acetyltransferase (*cat*) flanked by FRT recombinase sites  
674 target sites, using primers with 20bp sequences immediately upstream and downstream of the native  
675 *trxA* locus. The FRT recombinase encoded on pCP20 was used to remove the *cat* resistance marker  
676 after PCR and sequencing confirmed proper deletion of *trxA*. The wild type *E. coli* AR3110 was  
677 engineered to constitutively express the fluorescent protein mKate2, and the *trxA* null mutant was  
678 engineered to constitutively produce the fluorescent protein mKO-κ. These fluorescent protein expression

679 constructs were integrated in single copy to the *attB* locus on the chromosome, and they allowed us to  
680 visualize the two strains and distinguish them in biofilm co-culture by confocal microscopy.

681

682 **Biofilm growth in microfluidic channels.** Microfluidic devices were constructed by bonding poly-  
683 dimethylsiloxane (PDMS) castings to size #1.5 36mm x 60mm cover glass (ThermoFisher, Waltham MA)  
684 (66, 67). Bacterial strains were grown in 5mL lysogeny broth overnight at 37°C with shaking at 250 r.p.m.  
685 Cells were pelleted and washed twice with 0.9% NaCl before normalizing to OD<sub>600</sub> = 0.2. Strains were  
686 combined in varying ratios (see main text) and inoculated into channels of the microfluidic devices.  
687 Bacteria were allowed to colonize for 1 hour at room temperature (21-24°C) before providing constant  
688 flow (0.1µL/min) of Tryptone broth (10g L<sup>-1</sup>). Media flow was achieved using syringe pumps (Pico Plus  
689 Elite, Harvard Apparatus) and 1mL syringes (25-gauge needle) fitted with #30 Cole palmer PTFE tubing  
690 (ID = 0.3mm). Tubing was inserted into holes bored in the PDMS with a catheter punch driver.

691

692 **Bacteriophage amplification and purification.** T7 phages (18) were used for all experiments. *E coli*  
693 AR3110 was used as the phage host for amplification. Purification was conducted according to a protocol  
694 developed by Bonilla et al. (68). Briefly, overnight cultures of AR3110 were back diluted 1:10 into 100mL  
695 lysogeny broth supplemented with 0.001 M CaCl<sub>2</sub> and MgCl<sub>2</sub>, and incubated for 1 hour at 37°C with  
696 shaking; 100µL phage lysate was the added and incubated until the culture cleared completely as  
697 assessed by eye. Cultures were pelleted, sterile filtered and treated with chloroform. Chloroform was  
698 separated from lysate *via* centrifugation and aspiration of supernatant. Phage lysate was then  
699 concentrated and cleaned using phosphate buffered saline and repeated spin cycles of an Amicon® Ultra  
700 centrifugal filter units with an Ultracel 200kDa membrane (Millipore Sigma, Burlington MA). Purified  
701 phages were stored at 4°C.

702

703 **Bacteriophage labeling.** Phage labeling began with a high titer phage prep (2x10<sup>10</sup> PFU/mL) produced  
704 using the method described above. 900µL of the phage prep was combines with 90µL sodium  
705 bicarbonate (1M, pH = 9.0) and 10µL (1mg/mL) amine reactive Alexa-633 probe (ThermoFisher, Waltham  
706 MA) and incubated at room temperature for 1 hour. Labeled phage were then dialyzed against 1L  
707 phosphate buffered saline to remove excess dye using a Float-A-Lyzer®G2 Dialysis Device MWCO 20kD  
708 (Spectrum Labs, Rancho Dominguez CA). Labeled phage were diluted in Tryptone broth (10gl<sup>-1</sup>) to  
709 working concentration (2x10<sup>7</sup> PFU/mL) prior to use.

710

711 **Phage-biofilm microfluidic experiments.** Biofilms consisting of varying ratios of susceptible and  
712 resistant cells were grown in microfluidic devices for 48 hours at room temperature (21-24°C) under  
713 constant media flow (tryptone broth 10gl<sup>-1</sup> at 0.1µL/min). Biofilms were imaged immediately prior to phage  
714 treatment to establish exact starting ratios of wild type cells (phage-susceptible) and *trxA* deletion mutants  
715 (phage-resistant). Subsequently, inlet media tubing was removed from the PDMS microfluidic device and  
716 new tubing containing phage diluted in tryptone broth (2x10<sup>7</sup> PFU/mL at 0.1µL/min) was inserted. Phage  
717 treatment continued for 1 hour, after which original tubing was reinserted to resume flow of fresh tryptone  
718 broth without phages. Biofilms were imaged approximately 6, 12, 24 and 48 hours after the conclusion of  
719 the phage treatment until a population dynamic steady state was reached.

720

721 **Imaging and quantification procedures.** Biofilms were imaged using a Zeiss LSM 880 confocal  
722 microscope with a C-Apochromat 10X/0.45 water objective or a 40X/1.2 water objective. A 594-nm laser

723 was used to excite mKate2, and a 543-nm laser line was used to excite mKO<sub>κ</sub>. A 640-nm laser was used  
724 to excite Alexafluor 633. Whole chamber Z stacks were acquired by utilizing 1x10 vertical tile scans (total  
725 rectangular area ~500x5000μm). Quantification of biomass was performed using customized scripts in  
726 MATLAB (MathWorks Natick, MA) as previously described in Drescher et al. 2014 (69) and Nadell et al.  
727 2015 (70).  
728

729  
730 **Supplementary Table 1: Model Parameters used for Simulations**

| Parameter          | Value used in the simulations | Description                                                               | References where applicable | Representative value ranges and additional references, where applicable                                                                                                 |
|--------------------|-------------------------------|---------------------------------------------------------------------------|-----------------------------|-------------------------------------------------------------------------------------------------------------------------------------------------------------------------|
| $x_{max}, y_{max}$ | 900 $\mu m$ , 150 $\mu m$     | The physical size of the system                                           | N/A                         | -                                                                                                                                                                       |
| $dl, dV$           | 3 $\mu m$ , 27 $\mu m^3$      | Length and volume of a grid element                                       | N/A                         | -                                                                                                                                                                       |
| $N_{max}$          | 1.1 – 8 $mg L^{-1}$           | Maximum density of substrate (range of values investigated in this study) | (71)                        | -                                                                                                                                                                       |
| $N_{max}$          | 0.055 – 0.4 $mg L^{-1}$       | Well-mixed simulation nutrient availability                               | (72)                        | -                                                                                                                                                                       |
| $D_N$              | $2.3 * 10^{-6} cm^2 s^{-1}$   | Diffusivity of substrate                                                  | (71)                        | -                                                                                                                                                                       |
| $h$                | 15 $\mu m$                    | Diffusion boundary layer height                                           |                             | -                                                                                                                                                                       |
| $K_N$              | 1.18 $mg L^{-1}$              | Half saturation constant for substrate                                    | (58, 73)                    | 5 - 225<br>Biofilm heterotrophic bacterial biomass, including fecal coliforms, e.g. <i>E. coli</i> (73, 74)<br><br>4.86<br><i>Pseudomonas putida</i> F1 on glucose (75) |
| $\delta_E$         | 20 $(m h)^{-1}$               | Erosion constant                                                          | (34)                        | -                                                                                                                                                                       |
| $m_s$              | $10^{-12} g$                  | Bacterial mass per cell                                                   | (76)                        | $10^{-12}$<br><i>E. coli</i> DSM 613                                                                                                                                    |
| $\mu_s$ (*)        | 14.1 $day^{-1}$               | Maximum growth rate                                                       | (77)                        | 17.8<br><i>E. coli</i> K-12 on glucose (78)<br><br>4.8-17.6<br><i>E. coli</i> K-12 on different substrates                                                              |

|            |                                                        |                                                                     |            |                                                                                                                                                                 |
|------------|--------------------------------------------------------|---------------------------------------------------------------------|------------|-----------------------------------------------------------------------------------------------------------------------------------------------------------------|
|            |                                                        |                                                                     |            | (79)<br>6.1<br>Wastewater<br>heterotrophic<br>bacterial biomass<br>(80)                                                                                         |
| $S_{max}$  | $200 \text{ g L}^{-1}$                                 | Maximum active<br>biomass density                                   | (81)       | -                                                                                                                                                               |
| $Y$        | 0.495                                                  | Yield of substrate<br>converted to biomass                          | (62)       | 0.69-0.77<br>Wastewater bacteria<br>(82)<br><br>0.41<br><i>E. coli</i> K-12 on<br>glucose<br>(78)<br><br>0.41-0.51<br><i>P. putida</i> F1 on<br>glucose<br>(75) |
| $\beta$    | 120                                                    | Phage burst size                                                    | (8, 83)    | Bacteriophage T7                                                                                                                                                |
| $D_p$      | $3.82 * 10^{-7} \text{ cm}^2 \text{ s}^{-1}$           | Phage diffusivity<br>constant                                       | This Study | Bacteriophage T7                                                                                                                                                |
| $I$        | $0.067 - 0.12 (m_s \mu\text{m}^3)^{-1} \text{ s}^{-1}$ | Rate of interaction of<br>phage particles with<br>biomass particles | This study | -                                                                                                                                                               |
| $\delta_p$ | $0.001 - 10 (\mu\text{m}^2 \text{ h})^{-1}$            | Phage removal rate                                                  | (8, 83)    | -                                                                                                                                                               |
| $\tau$     | 28.8 minutes                                           | Incubation period<br>before lysis                                   | (30)       | Bacteriophage T7                                                                                                                                                |
| $\gamma$   | $2.92 \text{ h}^{-1}$                                  | Infection rate per<br>biomass per phage                             |            | -                                                                                                                                                               |

731

732

733

734

735

736

(\*) The max growth rate is determined from the model equations as  $\mu_s = q_s Y$ .  $q_s$  is the substrate uptake rate with value  $28.5 \text{ g day}^{-1}$  as in Lapidou et al. (77)

737 **Supplemental Figures**

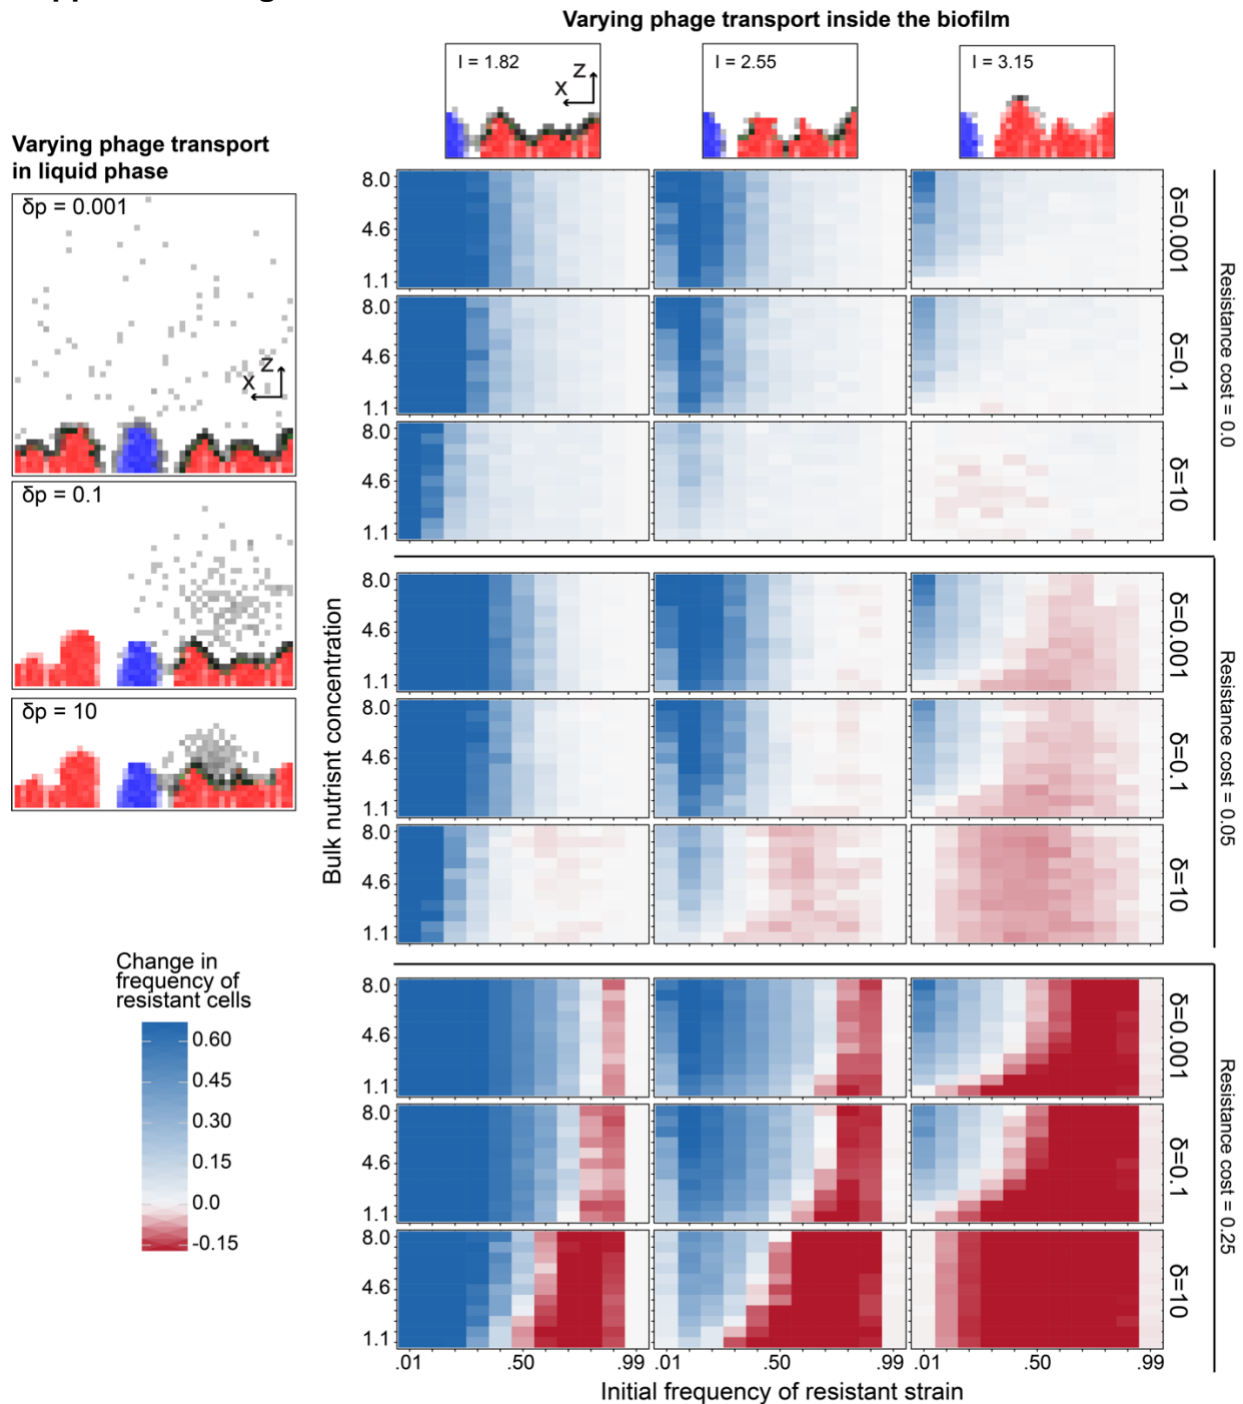

738  
 739 **Figure S1. Parameter sensitivity analysis for predicted coexistence of phage-resistant and phage-**  
 740 **susceptible cells.** The robustness of the predictions outlined in the main text were tested with variation  
 741 in the cost of phage resistance, the diffusivity of phages through biofilm biomass, and the speed of phage  
 742 transport/removal in the liquid phase outside of biofilms. As in Figure 1 of the main text, for each  
 743 parameter combination, simulations were run for a range for varying initial strain frequency, and for  
 744 varying bulk nutrient concentration, which controls the bacterial growth rate. The heatmaps depict the  
 745 change in frequency of the resistant strain after phage exposure.



746

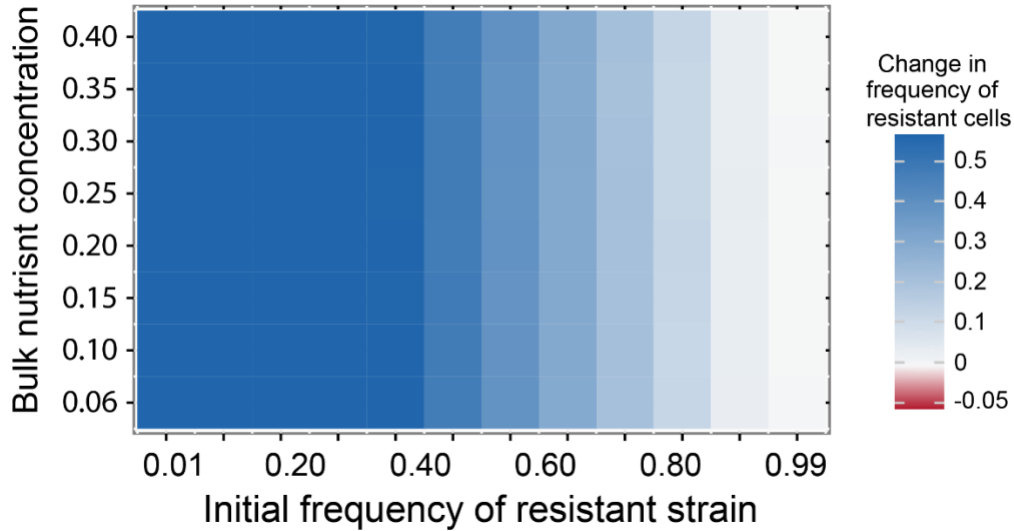

747

748

749

750

751

752

753

754

**Figure S2. Phage-resistant cells are positively selected from all initial frequencies in well mixed conditions.** Population dynamics of phage-resistant and phage-susceptible cells in an implementation of our simulation models in well-mixed conditions with parameter settings otherwise the same as in Figure 1 of the main text. In this condition, where all cells and phages interact randomly in the absence of constraint by spatial structure, the resistant strain always increases to fixation as long as phages do not permanently adsorb to resistant cells.

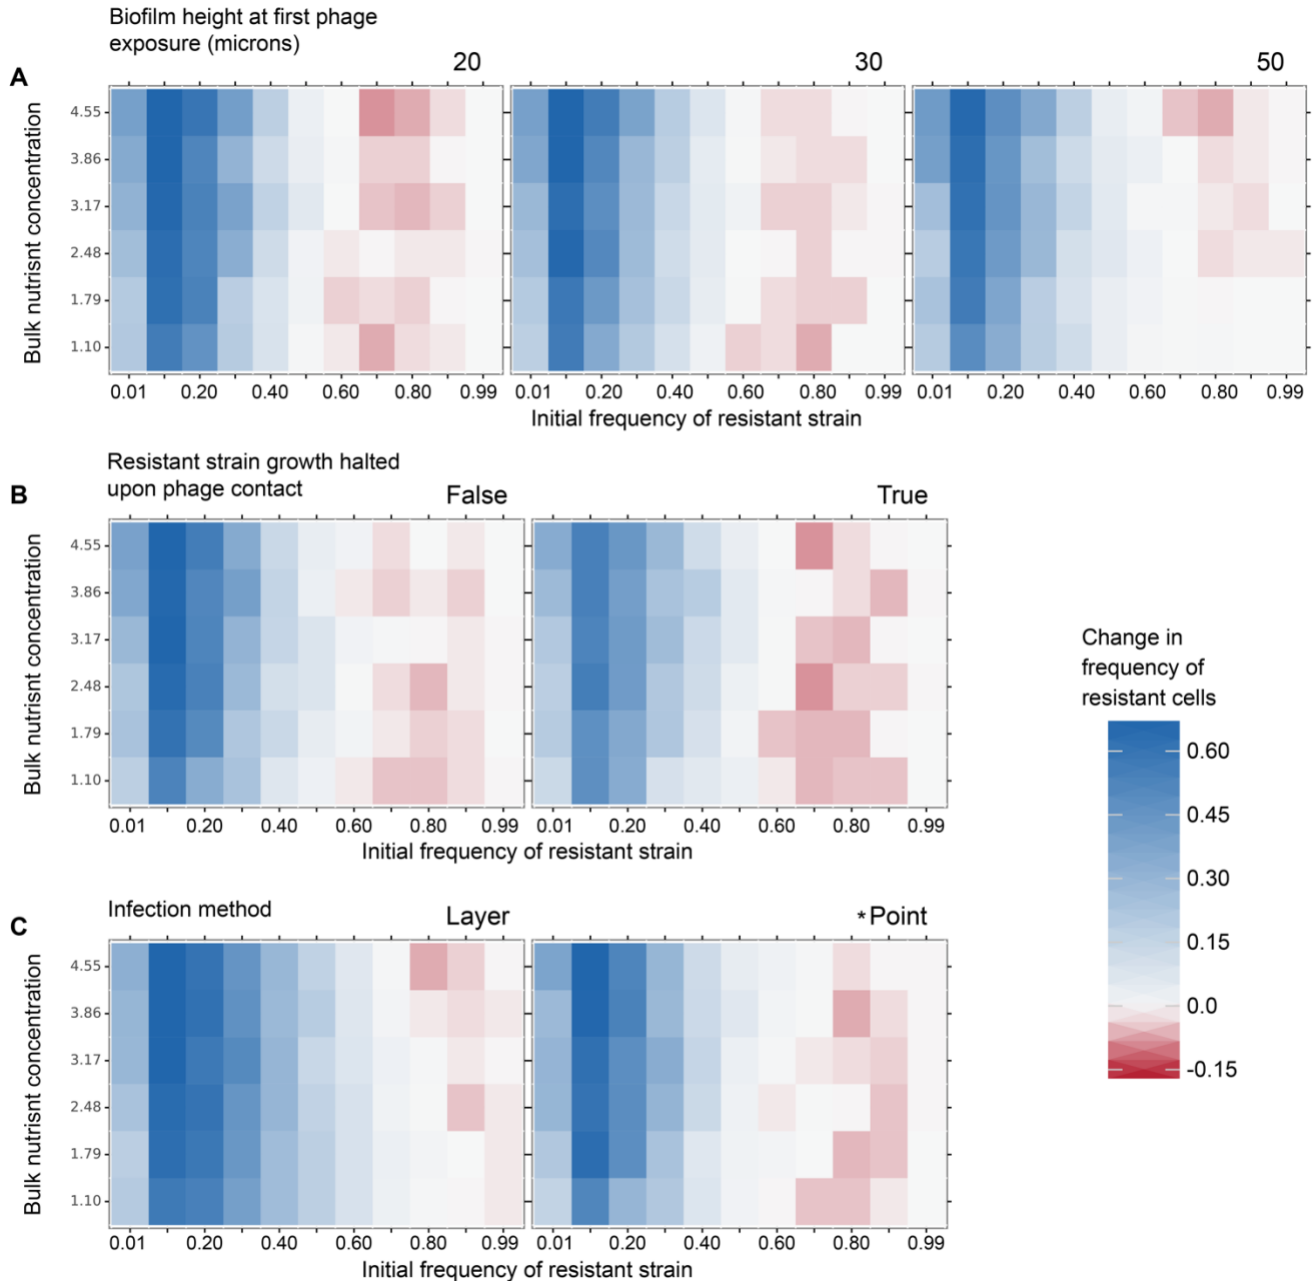

755  
756  
757  
758  
759  
760  
761  
762  
763  
764  
765

**Figure S3. Extended simulations testing the robustness of negative frequency dependent selection for phage resistance.** In addition to core simulation parameters assessed in figure S1, we also tested for the robustness of our results against (A) variation in the threshold biofilm height at which phages were pulsed into the system, (B) whether or not resistant cell growth halts upon phage contact, which is the case for some forms of phage resistance that do not permit phage amplification but still allow phage entry into the host cell, and (C) whether phages were introduced in an even layer across the biofilm upper surface, or at a single point on the biofilm surface. All other parameter in these simulations are the same as those used for simulations summarized in Figure 1 of the main text.

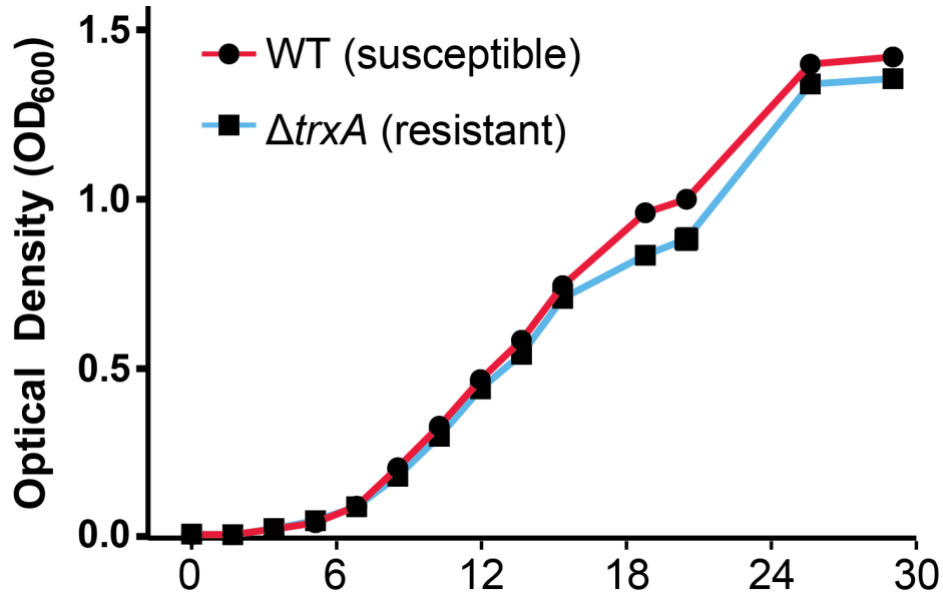

766

767

**Figure S4. Growth curves of *E. coli* wild type AR3110 (phage T7-susceptible, blue) and  $\Delta$ *trxA* mutants (phage T7-resistant, red) in tryptone liquid culture with shaking at 30°C.** Data points

768

denote mean values of 6 total runs of the experiment. Fitting each run to the logistic growth equation

769

yielded an average maximum growth rate of  $0.40 \pm 0.004 \text{ h}^{-1}$  for the phage-susceptible WT, and a

770

maximum growth rate of  $0.37 \pm 0.002 \text{ h}^{-1}$  for the phage-resistant  $\Delta$ *trxA* mutant.

771

772

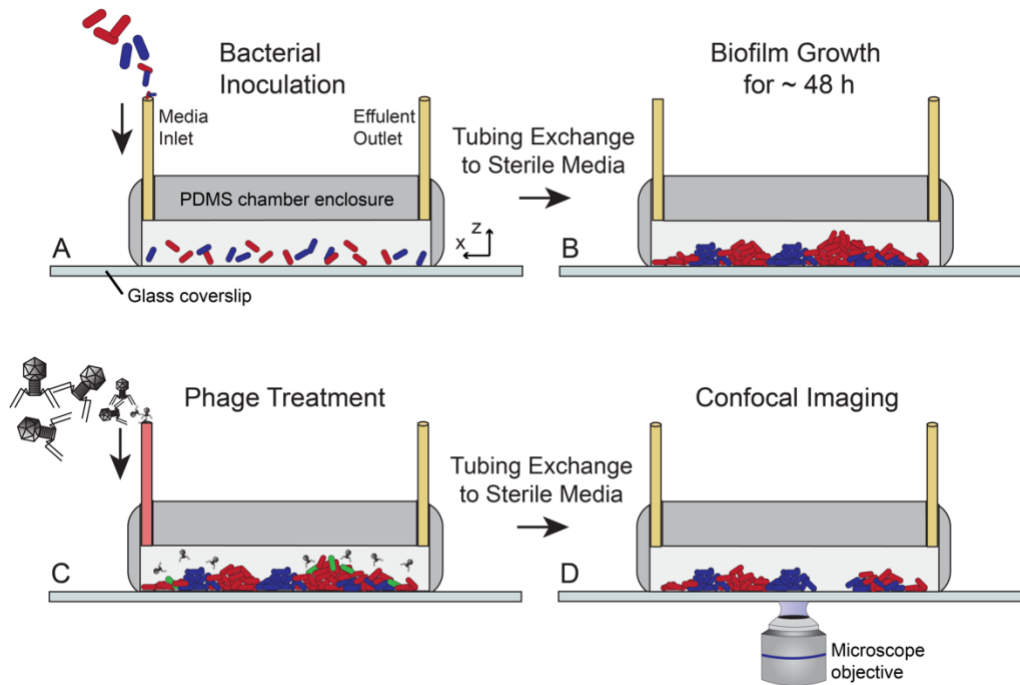

773  
774  
775  
776  
777  
778  
779  
780  
781

**Figure S5. Diagram of experimental biofilm growth and phage treatment regime.** (A) Biofilms were grown by inoculating phage-susceptible and -resistant cells in controlled ratios (see main text) onto the glass bottom of PDMS microfluidic devices. (B) Biofilms were grown in the absence of phage for 48 hours, after which (C) the medium inlet tubing was switched to perfuse biofilms with T7 phages. (D) the inlet tubing was replaced again to continue flow of fresh media, and image series were acquired by confocal microscopy.

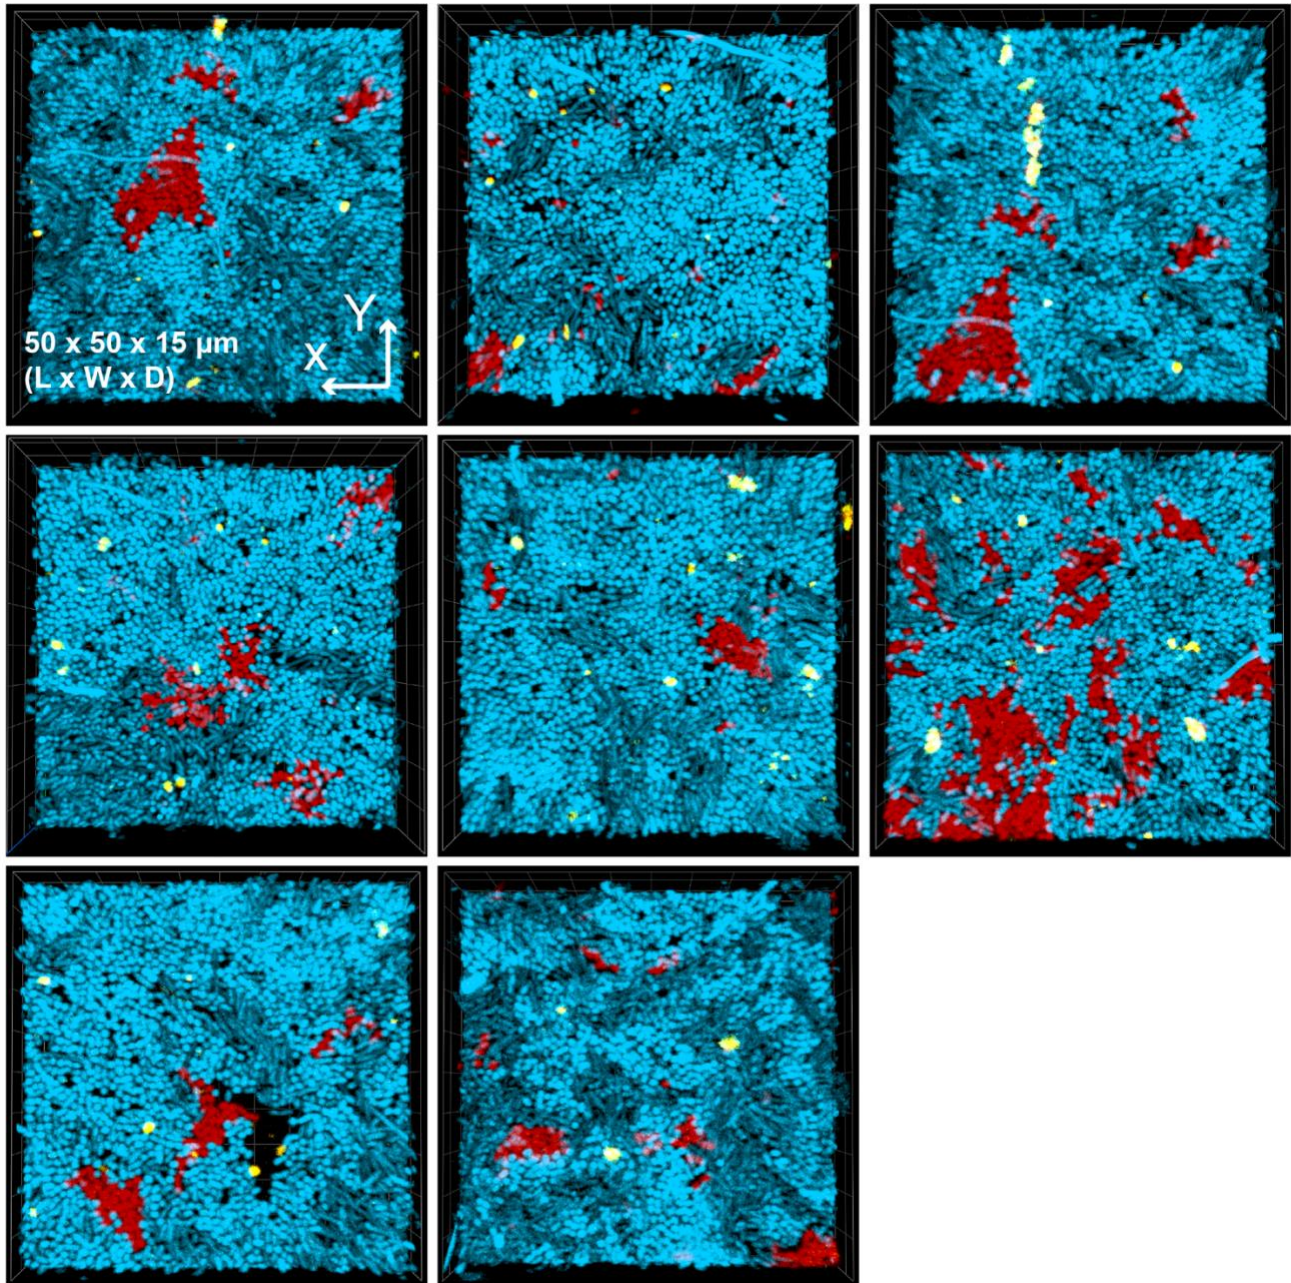

782

783

784

785

786

787

788

789

**Figure S6. Phages (yellow) trapped by majority resistant bacteria (blue) are unable to reach and infect sparse patches of susceptible cells (red).** Additional replicates of the experiment depicted in Figure 4 of the main text, in which biofilms inoculated with 20:1 resistant-susceptible cells were grown for 48 hours and then pulsed with phages for prior to imaging by confocal microscopy. Each panel above is a 3-D biofilm volume rendering  $\sim 50\mu\text{m} \times 50\mu\text{m} \times 15\mu\text{m}$  [L x W x D]. Note that the top-left panel is a recapitulation of Figure 4 for comparison with other replicates.



790 **Supplemental Videos**

791

792 **SI Video 1:** A video illustrating the clearance of almost all susceptible cells (red) by phage (black)  
793 infection. This occurs when resistant cells (blue) are initially rare in the population. This video is the  
794 extended time series from which frames were taken for Figure 1B of the main text.

795

796 **SI Video 2:** A video illustrating the sequestration of phages (black) by majority resistant cell clusters  
797 (blue), protecting most of the minority susceptible cell population (red) from phage exposure. This occurs  
798 when resistant cells are initially common in the biofilm population. This video is the extended time series  
799 from which frames were taken for Figure 1C of the main text.

800

801 **SI Video 3:** A biofilm simulation in 3-dimensions illustrating the clearance effect by which susceptible  
802 cells (red, infected cells shown in green), when common in the biofilm population relative to resistance  
803 cells (blue), are mostly or entirely killed off by a propagating phage infection.

804

805 **SI Video 4:** A biofilm simulation in 3-dimensions illustrating the phage sequestration effect by which  
806 susceptible cells (red, infected cells shown in green), when initially rare in the biofilm population, are  
807 protected from phage exposure by the majority of resistant cell clusters (blue) in their surroundings, which  
808 prevent phages from reaching susceptible hosts in which to infect and multiply.
